# Supplementary material
Source: PubMed Central journal article supplement (PMC275486)
Supplement: nar_31_21_e129__1.pdf [file nar_31_21_e129__1.pdf]

**Supplement 1.** The single nucleotide polymorphisms and oligonucleotides

| dbSNP ID <sup>1</sup>    | Genomic location | Variation | Frequency <sup>2</sup> | PCR primer Sequence 5'-3' <sup>3</sup>                                        | Product size (bp) | MS-primer Sequence 5'-3' <sup>4</sup>                                                      |
|--------------------------|------------------|-----------|------------------------|-------------------------------------------------------------------------------|-------------------|--------------------------------------------------------------------------------------------|
| rs715405 <sup>VIII</sup> | 1p31             | A/G       | 57/43                  | AGGTATTACTCTGCTTACCACA<br>CTGAGATGTTATTTGCTAGTTCA                             | 174               | ATGCCAGGTCGTAGTCGAATAAAGACTGCTCACTGACAAAG<br>TAGTCAGGTTGGATGTCTACCAGGCATTATATTTAGGCTGA     |
| rs2991269 <sup>IX</sup>  | 1p32.3           | A/G       | 77/23                  | ACTCTGCAGGAGGATAAAGAC <sup>5</sup><br>GAGACACACCTTGCCTAGAC <sup>6</sup>       | 195               | GTCCTCGTTCGTCTATGAGATCGACAGTGAGTGTGGCCC<br>GAGTAGCCTTCCCAGCATTGGGTCCTGAGCTTGATGAA          |
| rs5707 <sup>VI</sup>     | 1q32             | T/G       | 53/47                  | GCACAATGGAACAGAACTCAC<br>GAGAGGCCTGGGGACAGAA                                  | 174               | CGATATAATGCTCGATACGGCACCGTAAGTTGGGCCGCC<br>CAATGATAGGCTAGTCTCGCGTCCGGGGCAGATGACCT          |
| rs383452 <sup>V</sup>    | 2p11.2           | G/A       | 63/37                  | AACCTCTGAGACCCTGAGACAC<br>CCTTATGGTGCTGGGCACA                                 | 217               | ATTCGCGCACCTGAGGATTTCTCCTCCTTGATAGAATGTC<br>ATTCACCTGACTCGCGTATAGCACAGTATAAAACTCACTAAA     |
| rs952798 <sup>X</sup>    | 2 q32.2          | C/T       | 52/48                  | AAAGCAAAAAGTGGACCCATAC <sup>5</sup><br>GCCCTATACAGCACAGATTCTAC <sup>6</sup>   | 273               | GCCGACGCTTCGACAGAATTAAGAAAGAAACCTTGAAGTG<br>CGTGCAAGTTACCGAGCTGACATCATTCACTATTTCCCTA       |
| rs1914408 <sup>X</sup>   | 2 q32.2          | G/A       | 81/19                  | GCAGCTTTATCTGCATTCAAAC <sup>5</sup><br>CCCCTGGGAAATGTTTCAC <sup>6</sup>       | 262               | AACAGTCTAACCTACGCGAGTTTTCTGTCCAGGGTAAGCCAC<br>ATACGTCTTACCGCACATAGACCCTGAGATGACAATGCCT     |
| rs1400657 <sup>X</sup>   | 2 q32.2          | A/C       | 88/12                  | CAGAATTGCTATGGCAGATTAAGAC <sup>5</sup><br>TGGTCGCAAAGAACCAAAATAC <sup>6</sup> | 171               | GGATACTATTCGTCGCTGTGAGGTCAGAGGAGTAATATTATTGG<br>CGTCACGTTACCTACATGATTATGGCACCTATTACAGCTGTT |
| rs715710 <sup>V</sup>    | 3p25             | C/G       | 67/33                  | CACCTTCTTGTTGTATCCCCA<br>GGAGTAATCAGGTCATGAGCA                                | 121               | CTGACTAATCGTGTAGGTGTGAGTAGAGAGCAAGATCAAAC<br>CTAATACATCGTGATACGGGCCTTATAAGAAGAGATGCAAG     |
| rs5186 <sup>II</sup>     | 3q21             | A/C       | 74/26                  | CCCCAAAAGCCAAATCCCAC<br>AGAAAAGTCGGTTCAGTCCAC                                 | 305               | ATGATGTGCAAAGTGCCGTCCACTTCACTACCAATGAGC<br>CTGGACCTTAATCGTGTGCGCCTTCAATTCTGAAAAGTAGCTAA    |
| rs714825 <sup>IV</sup>   | 4q12             | T/C       | 55/45                  | GGTGTCTCCATTATGCTATCCA<br>CCAGACTGTCACTTCATATTCTCA                            | 187               | AGCAGCATCGTAGAGCGTCATGTACATGAGGACTGAGAAAC<br>AGCTGCATCCTAGCGTCATGCCTGATTAGTTAGTTGAATAAGT   |
| rs5333 <sup>I</sup>      | 4q31             | T/C       | 82/18                  | CGTCGAGAAGTGCCAAAAACA<br>TACACAGGATCATACTAAGTAA                               | 190               | ACAGGCGCTGCAACCGATATCTTTGCTGGTTCCTCTTCA<br>AGAGCCCTGCAACCGCATATGTTTTCTTCAATATACGGCTTAA     |
| rs5335 <sup>II</sup>     | 4q31             | G/C       | 56/44                  | CAGTGGAAGAACCAGATCA<br>TCTTGGGTGTGGGAGTGAA                                    | 192               | AATCTATCTACAAGCCGGTCAAAATACAAGGCAACTGTGA<br>AAATGATCTCACCGCTACTTCAGAGAAGAGATTCCCGGA        |

|                          |          |     |       |                                                                            |     |                                                                                           |
|--------------------------|----------|-----|-------|----------------------------------------------------------------------------|-----|-------------------------------------------------------------------------------------------|
| rs714932 <sup>VIII</sup> | 5p13.3   | G/A | 62/38 | CAAATCCCAAAAACCTTCACCAA<br>TTCAAAGTCTTCAGGATAGCAA                          | 170 | AGTCATAGTACCTCATGCTCTTCTATCTCACCAGAAAAAA<br>ACTGTCGTCAACGTCAGGCAGGATAGCAAATTCTAGTGTITTT   |
| rs1042717 <sup>II</sup>  | 5q32     | G/A | 78/22 | GTCACCAACTACTTCATCACTTCAC<br>TGGCAAAGTAGCGATCCAC                           | 205 | CTCAACAGTGTATCCGGTGGGCTGATCTGGTCATGGGCCT<br>CTGCGTACTGTATAAGGATGGCCCCAAAGGGCACCCTGC       |
| rs1042719 <sup>I</sup>   | 5q32     | G/C | 68/32 | GATTTCAAGGATTGCCTTCCA<br>ATGGCCCACAAAGTCTTCC                               | 180 | CTCATTAGTATCATCGTCGGGTCTTCTTTGAAGGCCTATGG<br>GCGTTATTCAGATCGAGTGACCGTTGCTGGAGTAGCCATT     |
| rs714470 <sup>VII</sup>  | 6p21     | A/C | 67/33 | CCTTGAGTCACATCATTTTCA<br>AGTTAGATGTACAAGGCTGAC                             | 172 | ACCGTAGCTCTCGGCAAGATCGAATAGCACATGTGTAAAAAT<br>ACGCTAATGACGGCAGTGCACAAAATCTGGGAGGATAGATG   |
| rs1874328 <sup>IX</sup>  | 7q32     | G/A | 53/48 | ATGTTGGTAACCCTCACCTCAC <sup>5</sup><br>TCGCACCTGTAATCCCAAC <sup>6</sup>    | 428 | AAACGACGTAGGCCGGACATTTGCCATTCAAAAATAATACCA<br>GTCCCACATGGTGCTTCGTAAGGCTCGAGACACTGGAGCTG   |
| rs1799983 <sup>I</sup>   | 7q36     | G/T | 64/36 | CATTCAGCACGGCTGGACC<br>TGCTCCAGGGGCACCTCAA                                 | 146 | CGTGCCGCTCGTGATAGAATCTGCTGCAGGCCCCAGATGA<br>GCTAGATCGTGC GTTATATGAGAAGGAAGAGTTCTGGGGG     |
| rs1799998 <sup>VI</sup>  | 8q21     | T/C | 61/39 | AATGAACTAAATCTGTGGTATAAAA<br>CCAGGGCTGAGAGGAGTAAA                          | 150 | GTATGTGCTGTTATCGAAGCCTATTAAGAATCCAAGGC<br>CTATGGCTGAGTATGTAACGCTTATCGTGAGATGAGAGGG        |
| rs1053887 <sup>IX</sup>  | 9p22     | G/A | 55/45 | GGCAGAAGTCATAGAAGTGTGGAC <sup>5</sup><br>CTGGCACAAATGGGAAGAAT <sup>6</sup> | 559 | GAAGTGC GTTCAACAGGTCTTTTCTGCTCTGACAACCTCCCA<br>TGCCCTATTGTTGCGTCGGAAGAAGAAATACAGCCCTTGTGC |
| rs2939 <sup>IX</sup>     | 9p22     | G/A | 73/27 | GGCAGAAGTCATAGAAGTGTGGAC <sup>5</sup><br>CTGGCACAAATGGGAAGAAT <sup>6</sup> | 559 | CAACGGGTGGACTCTGCAATATAGAAGTGTGGACTGGTGT<br>ATTGACCAAACCTGCGGTGCGAAATGATCTGTATTGACTAA     |
| rs713503 <sup>IV</sup>   | 11p15    | G/T | 60/40 | AGCCTGCTACCACTTTGCCA<br>AGAGGGAGAATCAGCCTACA                               | 297 | GAATAGTGTCTG TAGGCTCTCGGACCATGCCTTGCTTTTGT<br>GGGCACGTTGCTAAACTGTTTGCTTGAAGGAAACACGGGA    |
| rs5092 <sup>I</sup>      | 11q23    | A/G | 51/49 | TGTTACCACCCAGGAGCCA<br>CACCACACACTGTAGTCCC                                 | 206 | TCGAGCGATTTATACATCCGAGTGCTGACCAGGTGGCCAC<br>CAATGATCGACCTGGAGTCTCTGAAGTAGTCCCACATCAC      |
| rs714760 <sup>IV</sup>   | 12q24.3  | G/T | 76/24 | GAATTGGGGAAGTGAGAGCA<br>TGGGAAAGAGTGCTGTCAAC                               | 152 | TCGGTTGCTTGGATGTACCCTGGTGGGAGTGAAATGTAAG<br>GGCGTTCGTGCAGCTTACTTGTCCCTCACCGTTTGCATG       |
| rs715447 <sup>VII</sup>  | 12q24.11 | G/C | 55/45 | ATATCCATTTGCTCCAGCATCA<br>AAGAATAAAGTGGGAGTAATCAC                          | 223 | AGCATATAGGGTACGCTAGATGATGATTGTAGCTGTATTGTA<br>ATGAAGACTCGTCCCTCGATTCTACCTGATTGATACTAAAAC  |
| rs715129 <sup>IV</sup>   | 13q12.3  | T/A | 57/43 | GACTTGCCACAGTCAAACA<br>ATAGTAGGTACCAGCCTCCA                                | 146 | CGGTCTCTGCATCTATAATCCACTGTACTATACCAGGT<br>CGCACGCCTCTGGAGTAAATTTGCATTTATCACTTAATATTTATA   |
| rs13841 <sup>VII</sup>   | 14q11.2  | C/T | 50/50 | AGGAAAGAGAGCACCTGCCA                                                       | 182 | ACCATATAGCCATCTAAGCGATCACTCAATCATTTTTCTGGA                                                |

|                          |          |     |       |                                                                                                          |     |                                                                                                                                    |
|--------------------------|----------|-----|-------|----------------------------------------------------------------------------------------------------------|-----|------------------------------------------------------------------------------------------------------------------------------------|
| rs2799 <sup>X</sup>      | 14q32    | C/G | 95/5  | GGAGAATCCTTCAAAATGCTAC<br>GCTGTCAATTGCGAGGTTCTAC <sup>5</sup><br>GGAGATGCAGAATTTGGTATATTTAC <sup>6</sup> | 197 | CCTCGATATGTACGGATAGGCCATTTCTAGCTGTTAACCCCT<br>CTTAACTATTAGCGTCGGTGGGAGAAGGCACCCAGCCATC<br>ATCCCATGACTACTCGTGAGGTTGGCTCCTCGCTGGGTCA |
| rs6083 <sup>VII</sup>    | 15q21    | A/G | 57/43 | CCCTTACCCCTGCTTTCCC<br>CTGTTTGATGCCACGCTCA                                                               | 198 | CAGCCGAATGGACTATCGCTTCTTTCTCCAGATGATGCCA<br>TAGTTGACTTGGAGTATGCCTATGAATGGCATCCACAAAA                                               |
| rs715296 <sup>IV</sup>   | 16p13.3  | G/C | 51/49 | GTTTTACCATAGACGGATTTACA<br>CTTAATGTCTAATGGATGCAAAC                                                       | 143 | CCAGCTCGTACTATCGAATAATTTTGGTTAATATCTTAATACCA<br>CACCATCGTCGTATCGAATATTAAGAGTATAATGCCAAAAAGA                                        |
| rs5882 <sup>VI</sup>     | 16q21    | A/G | 72/28 | TGCTCCAGGGAGGACTCAC<br>CAGCCCACACTTACGAGACA                                                              | 165 | ACAGTCGCCTAGCGGTATATTGCAGAGCAGCTCCGAGTCC<br>AGGTACGCTCCTAGTCCATAGACTGCAGGAAGCTCTGGA                                                |
| rs744166 <sup>IX</sup>   | 17q21    | G/A | 52/48 | GAAAGGGAGGAGTAAGTGACAAC <sup>5</sup><br>AGGGGATGGCAGGTTTTAC <sup>6</sup>                                 | 334 | GTTTCTTATTAGCGAGGAGCTGTTCTATAAATTACTGTCA<br>ACTCTCGACCTAGCGTAAGGAATGTCTTGAGGGAATCGAGC                                              |
| rs713197 <sup>VIII</sup> | 18q11    | G/T | 57/43 | AATCGATATTTTGATCCATTGAC<br>CTCTTTGCCTTGAACCTTGAC                                                         | 219 | GATAAGCGTTCACAGCTCGGTGGGGTCATAAGATTTCTTCAA<br>CTCAAATCTTAGCACTCGTGAATATTTAAAAAATGTACCAAAATAT                                       |
| rs715351 <sup>VI</sup>   | 18q21.3  | A/G | 50/50 | AGGCGACACCAGTTTGTCCA<br>GAGATATGTGGTTTCTGCTTCA                                                           | 275 | GACCAAGCTCGTTAGATAGTCCACGGGCCTCAAGTTCAA<br>AGCCCAGATCCTACGAGATGGTTGGATCTGAGAGCACTG                                                 |
| rs5930 <sup>II</sup>     | 19p13.3  | G/A | 82/18 | CCTTCTCTCCTCTGCCTCA<br>TCTTCACGCCCTTGGTATCC                                                              | 185 | AGGTGGCTGCACGCTAAATTATGACACCGTCATCAGCAG<br>AGGTGCATGGACGAACATCCCGTCGGGGCCCTGGATGTC                                                 |
| rs280523 <sup>IX</sup>   | 19 p13.2 | C/T | 88/12 | ACCTCTGGGCTAGAGAGGAAC <sup>5</sup><br>CGGCAATATGCAAAGTCTAC <sup>6</sup>                                  | 361 | CGTTCCTAAAGCTGAGTCTGATCACTGTGGGAGCTGTGAC<br>GCACGTCGTATTAGGTAGTCAAAGTGGTGGATCTCCTCCTC                                              |
| rs1578401 <sup>III</sup> | 20p 11.2 | A/G | 57/43 | TTTCCTGATGCTACAGACCAC<br>AACCTGGGATAATAAATACAGAC                                                         | 278 | GGCTACTATTCGATCATAACGAATGCCATCACTTTTCTCATT<br>CGCCTATCTGGTAATAACTGCCATATTTACTTATATACCTGAAA                                         |
| rs890613 <sup>III</sup>  | 20p11.2  | T/C | 94/6  | CCAATTATATACAAAGGCTACAC<br>ACATCCACTTAAAAATGTCTCAC                                                       | 237 | TGCGTTGGTTGTCGCTCACAACAGTTGAGCCTTTCCCATC<br>GTGTCTGGTGTTCGATAACCCTTCTGTTCTTTGAGGATCTTC                                             |
| rs753381 <sup>IV</sup>   | 20q12    | C/T | 58/42 | CCCAGGTTGGCAGTGGCA<br>GCACACAGGAGACAAGCACA                                                               | 260 | CGTGACAATGTACTATGGAGGAGGACGAGCTGACCTTCA<br>CGCGTCGATCTAGGTGACTACTGGATGATGGCGCTCTTG                                                 |
| rs715147 <sup>VII</sup>  | 20q13.2  | A/G | 66/34 | GACAGCCATAGAATTCAGCA<br>CTTGACCTGTCTTTGAAGCCA                                                            | 200 | GGTGATACTTCGCTATATGGCTTAGAACTAGCCAGCCCT<br>GGCTATACTTGACAGTGATGGTTGCCTTGTCTGCCAGTG                                                 |
| rs715231 <sup>V</sup>    | 21q21.3  | C/T | 68/32 | ATTTGATTAGTTGGATTGGGAC<br>CCATTAAAGCCTGAAATACACA                                                         | 192 | CGAGTGCTCCGTGCGAAATAACTGAAAATAACATCTCTCTG<br>CGCGGTCATCGTGCGAATAATCTTTTTTTTATACCTAGTCCC                                            |

|                          |          |     |       |                                                                                 |     |                                                                                           |
|--------------------------|----------|-----|-------|---------------------------------------------------------------------------------|-----|-------------------------------------------------------------------------------------------|
| rs3153 <sup>X</sup>      | 21q22.11 | G/A | 66/34 | ACTGAGTGTTCTGCAGATATATAAC <sup>5</sup><br>TTATATTTGAACACCTGACCTGAC <sup>6</sup> | 149 | ACCAATGACCATATACGGCGGGAGACAAATGGGGACCAGAG<br>AGTAGTGCGAAAGGCTCCTAGACCTGACCTCTGACATGTGG    |
| rs713625 <sup>VII</sup>  | 22q11.23 | C/T | 67/33 | TCTGCTAGGAAATCTCAGAAC<br>GCTCAACACTGCGAGGTCA                                    | 162 | GGTTCCTCTGATGTGCTAGACTTTCTCCAGCATAGCAAAAG<br>CAGTCTACGATGGCAAGTCTCTCCTGCCTCTGGGGAT        |
| rs713753 <sup>VIII</sup> | 22q13.1  | C/T | 56/44 | TAGAGGCAACTCCAGGTCAA<br>TTGGTGCCTCTCTTTCCACA                                    | 183 | GCGGTATGTCGTGCTATAATGTCAAAGGTGGGAACCAA<br>GGCGTCTGTCGTGCTCATAACTTTGGGCAGGATCTTGGT         |
| rs715328 <sup>VO</sup>   | Xp22.1   | C/T | 57/43 | ACCAAGGACATTAGTGGATTCA<br>GCTTCCATCAGGGGTTCTCA                                  | 297 | ATCGCACCTCGTAGGAGTCAGTGTAATAATGTTGGAGGCAGA<br>GTTGCCACTCGTTGATAGTCAGTCTGTCTTTAAAGATAATAAC |

<sup>1</sup> The identification numbers are from the dbSNP database: <http://www.ncbi.nlm.nih.gov/SNP/>. The roman indexes (I-X) indicates which SNPs has been amplified together in multiplex PCR (Lindroos, K. et al. (2002) *Nucleic Acids Res*, **30**, e70., Liljedahl, U. et al. (2003) *Pharmacogenetics*, **13**, 7-17.).

<sup>2</sup> Allele frequencies as determined in a pool of Swedish men by solid-phase minisequencing (Syvanen, A.C. et al. (1993) *Am J Hum Genet*, **52**, 46-59.).

<sup>3</sup> PCR primer sequences. The forward primers are given above their corresponding reverse primers.

<sup>4</sup> Minisequencing primers. The primers with the same polarity as the forward PCR primers are given above the primer on the complementary strand. The 20 most 5' bases of the primer are tag-sequences with complementary cTags included in the printed arrays.

<sup>5</sup> These PCR primers contained the universal sequence TTC TAA TAC GAC TCA CTA TAG or TTC TAA TAC GAC TCA CTA TAG GGA GA in the 5' end.

<sup>6</sup> These PCR primers contained the universal sequence GCG GTC CCA AAA GGG TCA GT in the 5' end.
